1  
2  
3  
4  
5  
6  
7  
8  
9  
10  
11  
12  
13  
14  
15  
16  
17  
18  
19  
20  
21  
22  
23  
24  
25  
26  
27  
28

**Title:**

**Is Mycetoma a Vector-Borne Disease: The First Report on the Detection of *Madurella mycetomatis* in Ticks**

**Authors:**

Azrag RS<sup>1,2</sup>, Bakhiet SM<sup>2,3</sup>, Almalik AM<sup>1</sup>, Mohamed AH<sup>1,4</sup>, Fahal AH<sup>2</sup>

<sup>1</sup>Vector Genetics and Control Laboratory, Faculty of Science, University of Khartoum, Sudan

<sup>2</sup>Mycetoma Research Center, University of Khartoum, Khartoum, Sudan

<sup>3</sup>Institute of Endemic Diseases, University of Khartoum, Khartoum, Sudan

<sup>4</sup>Wild Life Research Center, Ministry of Animal Resources, Khartoum, Sudan

**Corresponding Author**

Prof. Ahmed Hassan Fahal,  
Professor of Surgery, The Mycetoma Research Centre, University of Khartoum.  
E. mail: [ahfahal@hotmail.com](mailto:ahfahal@hotmail.com)- [ahfahal@uofk.edu](mailto:ahfahal@uofk.edu)

29

## 30 **Abstract**

31 Currently, there is a massive gap the mycetoma knowledge in particular in its  
32 epidemiological characteristics, the infection route, the predisposing factors and the  
33 host susceptibility. With this background, the present cross-sectional descriptive  
34 entomological study was conducted to determine the possible role of arthropod  
35 vectors in the transmission of eumycetoma as well as the knowledge, attitude and  
36 practice (KAP) among the villagers towards that in a mycetoma endemic village at  
37 Sennar State, Sudan.

38 The study showed an abundance of indoors and outdoors arthropod vectors, and  
39 that included ticks, mosquitoes, sandflies, cockroaches and houseflies in the studied  
40 area. Ticks were more frequent, and they belonged to three genera and four  
41 species, and the later included *Hyalomma (H.) anatolicum* (11.03%), *Hyalomma (H.)*  
42 *rufipes* (0.67%), *Rhipicephalus (R.) everts* (73.1%) and *Amblyoma (A.) lepidium*  
43 (15.2%). The different types of the collected arthropod vectors were pooled in  
44 groups, and each group was screened for the presence of the *Madurella (M.)*  
45 *mycetomatis* DNA, the most frequent causative agents of eumycetoma in the studied  
46 area. The DNA was extracted, and amplification of the genomic rRNA genes was  
47 done by using universal pan fungal primers and specific *M. mycetomatis* primers.  
48 One pool containing *R. evertsi* DNA samples and one sample of *H. Rufipes* DNA  
49 gave positive results following PCR amplification of the universal fungal positive  
50 primers while *H. rufipes* sample gave positive results for *M. mycetomatis* using a  
51 specific primer. An association between the animals' dungs, ticks and mycetoma

52 transmission can be suggested from this study. However, further in-depth studies  
53 are needed to verify that.

54

## 55 **Keywords**

56 Mycetoma; eumycetoma; arthropods; vector-borne disease; transmission; *Madurella*  
57 *mycetomatis*; ticks; Sudan.

58

## 59 **Author summary**

60 Mycetoma is a severely neglected tropical disease characterised by painless  
61 subcutaneous tumour-like swellings frequently noted in the extremities. There is a  
62 massive knowledge gap in transmission, infection route, and historically, it is  
63 believed to be associated with minor trauma caused by thorn pricks. This study was  
64 designed to determine the possible role of arthropods in mycetoma transmission in  
65 an endemic area in Sudan during the cold dry season. Pools of medically important  
66 arthropods were screened for mycetoma causative agents using DNA based  
67 method. The villagers' habits and knowledge on arthropod vectors were examined  
68 using a pre-designed questionnaire. The results showed various presences of many  
69 arthropod vectors. Ticks were found in high prevalence, and densities in domestic  
70 animals found inside houses and the villagers had high contact level with the ticks in  
71 comparison to other vectors. The study reports for the first time, the detection of the  
72 causative agents of mycetoma in a pool of ticks. More studies on the possible role of  
73 ticks in the transmission of mycetoma diseases are badly needed to delineate the  
74 possible role of ticks on transmission of mycetoma.

75

## 76 **Introduction**

77 Mycetoma is a chronic specific granulomatous progressive subcutaneous  
78 inflammatory disease, of both bacterial (actinomycetoma) and fungal (eumycetoma)  
79 origin [1]. The most common causative agents include the fungus *Madurella*  
80 *mycetomatis* and the actinomycetes *Nocardia brasiliensis*, *Actinomadura madurae*,  
81 *Streptomyces somaliensis*, and *Actinomadura pelletierii* [2]. Mycetoma is endemic in  
82 many tropical and subtropical regions, and Sudan is reported to have the highest  
83 incidence [3]. Most of the affected patients are of poor socio-economic status and  
84 low health education level and hence the late presentation and poor management  
85 outcome [4,5].

86

87 Being, a gravely neglected tropical disease, there is a massive knowledge gap in its  
88 pathogenesis and epidemiological characteristics. The latter include the disease  
89 susceptibility, resistance, transmission route and the incubation period, and that had  
90 led to difficulty in designing an objective control or preventive programme [6]. For the  
91 disease infection route of entry, the popular theory is, the infection is established  
92 following the traumatic subcutaneous inoculation of the causative agents following  
93 minor trauma caused by thorn pricks, sharp objectives, animals bites, and others  
94 [6,7]. However, in mycetoma endemic areas, the habit of going barefooted is  
95 frequent, and the minor injuries and thorn pricks are abundant. Thus it is expected  
96 that the incidence of mycetoma to be higher if this theory is true. Furthermore, many  
97 patients have no history of local trauma at the mycetoma site.

98 The primary reservoir of the causal agents is believed to be soil as several causative  
99 agents were cultured or their DNAs were isolated from the soil. That included  
100 *Actinomadura madurae*, *Actinomadura pelletierii*, *Nocardia asteroides*, *Nocardia*  
101 *brasiliensis*, *Streptomyces somaliensis* and among the fungi, *alciformispora*  
102 *senegalensis*, *Madurella mycetomatis*, *Neotestudina rosatii* and *Scedosporium*  
103 *boydii* [8-14]. Furthermore, it was observed that mycetoma endemic villages are  
104 characterised by poor hygiene and overcrowded houses and their proximity to the  
105 animals' enclosures and their dungs. Also, the thorny trees and bushes are plenty;  
106 thus, several environmental factors are believed to predispose to mycetoma [15]. In  
107 mycetoma endemic villages with such poor environmental and hygienic conditions, it  
108 is expected to have rich collections of arthropod vectors able to transmit many  
109 diseases. With this background, this study was conducted to determine the role of  
110 arthropod vectors in an endemic village in Eastern Sennar, Sennar State, Sudan in  
111 the transmission of mycetoma. In this communication, we report for the first time a  
112 preliminary data on the possible role of arthropod vectors in the transmission of  
113 *Madurella mycetomatis* in the studied village.

114

115

## 116 **Materials and Methods**

### 117 **Entomological surveillance**

118 This descriptive cross-sectional study was conducted at Wad Al Nimar village, a  
119 mycetoma endemic village during the cold dry season. The village is located on the  
120 western bank of Aldindir River, Eastern Sennar locality, Sennar State, Sudan. It has

121 a tropical climate with an annual rainfall of 600 mm and with varies relative humidity  
122 of 18% to 80% and temperature varies between 20<sup>0</sup>C and 40<sup>0</sup>C. The soil is mainly  
123 black cotton one, which cracks during the dry season and expands when the rain  
124 commences. The area has relatively rich natural vegetation with forest that cover  
125 about 34% of Sennar State ground. The State vegetation is characterised by  
126 savannah low rainfall trees and bushes dominated by *Acacia (A) seyal*, *A. Senegal*,  
127 *A. nilotica*, *A. mellifera* and *Balanites aegyptiaca*. Most buildings are made of mud  
128 that is mixed with animal dung locally known as zebalah. Cracks on the walls of  
129 traditional houses made of zebalah provide suitable places for arthropod vectors to  
130 hide and rest. All houses include animal shelters for domestic animals. Aldindir River  
131 banks host many small farms of vegetables and fruits.

132

### 133 **Collection methods**

#### 134 **Collection of indoor and outdoor disease vectors**

135 Entomological surveillance for indoor resting and outdoor disease vectors was  
136 carried out in twenty randomly selected houses at the studied village. Informed  
137 written consent was obtained from the head of each house. In each of the selected  
138 houses, a combination of different collection methods was conducted, and that  
139 included light traps, sticky paper traps, active search and Knockdown methods[16].  
140 Light and sticky paper traps in addition to active search methods were used for the  
141 collection of outdoor nocturnal vectors from animal shelters. Two light traps were  
142 suspended with the fan 40-50cm above the ground level. Traps were set one hour  
143 before the sunset and collected early next morning before the sunrise. The traps

144 were transported to the field laboratory where sandflies and mosquitoes were sorted  
145 by sex and genus and were preserved in 70% ethanol for later identification to  
146 species level. For sticky trap collection, A4-sized white sticky traps (10 per night for  
147 three nights) coated with sesame oil were used to capture sandflies from outdoor  
148 habitats. A set of 10 sticky traps were hung vertically in a row of 30 cm above the  
149 ground supported by wooden sticks. Sticky traps were removed early in the morning,  
150 sandflies were removed using forceps and stored in 80% ethanol in labelled vials for  
151 further identification.

152 The Knockdown and active search collection (direct pick up) methods were used to  
153 collect indoor (inside rooms) diurnal resting mosquitoes and sandflies vectors. For  
154 Knockdown method, the rooms were sprayed early morning between 6:00 and  
155 8:00am with commercial insecticide (Pif Paf). White sheets (2 x 2 meters) were laid  
156 on all flat surfaces over the entire floor and beds in the room, and all doors and  
157 windows were closed. Rooms were sprayed in a clockwise direction and care was  
158 taken to start spraying from the roof and all open spaces or holes in the walls until  
159 the room was filled with a fine mist. Then the room was quickly closed. After about  
160 15 minutes, the door was opened, and the sheets were picked one at a time from  
161 their corners. The sheets were carried outside, and all knocked down arthropods  
162 were collected outside the rooms in daylight using forceps. Adult mosquitoes were  
163 stored dry in labelled Petri dishes using silica gel. Other arthropods were preserved  
164 in 80% ethanol in labelled falcon tubes.

165 Collection of tick samples from domestic animals was carried out by a veterinary  
166 doctor in addition to two trained volunteers from the local community. Ticks were

167 directly collected from the invested domestic animals found in animal shelters (cows  
168 and goats only) and preserved in labelled Petri dishes using silica gel. Also, an  
169 active search for immature stages of ticks was carried out in some animal shelters.  
170 Search was focused on specific areas that included underneath fresh and dry animal  
171 dungs, water tanks and fresh plants offered as animal feed.

172

### 173 **Identification of arthropod Vectors**

174 The morphological identification of the collected mosquitoes, sandflies and ticks was  
175 done according to keys used for the Afrotropical region [17–20]. Female mosquitoes  
176 and ticks were identified morphologically under a dissecting microscope. All  
177 collected sandflies (females and males) were sorted out as *Phlebotomus* or  
178 *Sergentomia* under a dissecting microscope then samples of *Phlebotomus* species  
179 were mounted on microscope slides in Puris media with their heads separated from  
180 thoraxes and abdomen. Identification of males was based on the morphology of  
181 external genitalia, and for females, identification was based on the pharynx, antennal  
182 features and spermathecae.

183

### 184 **Knowledge, attitude and practice (KAP) survey towards arthropod vectors**

185 A KAP survey was conducted among the villagers in the studied village to determine  
186 knowledge, attitude and practice of villagers towards medically important arthropod  
187 vectors in the village. The survey was conducted by a team of two researchers and  
188 one health officer from the local community. A predesigned questionnaire was first  
189 tested in the field prior to the data collection for validation. The designed KAP



190 questionnaire consisted of 49 questions which were grouped on 14 major sections.  
191 Eighty-one randomly selected villagers participated in the study after informed  
192 consent.

193

#### 194 **Molecular screening of arthropod vectors**

195 Pools of all collected mosquitoes, sandflies and tick samples were screened for the  
196 presence of *Madurella mycetomatis* using a modified method for the amplification of  
197 the (ITS1)-5.8S-ITS2 DNA region. Universal fungal and specific *Madurella*  
198 *mycetomatis* primers were used. The technique used was validated at the Mycetoma  
199 Research Center, Sudan.

200

#### 201 **DNA extraction**

202 DNA was extracted from pools of arthropod vectors. The DNA extraction was done  
203 using a modified protocol for DNA purification from tissues (QIAGEN KIDS). Fifteen  
204 metal beads were added in microcentrifuge tube. 500µl from ATL buffer was added,  
205 and the tube was put in the tissue lyser machine for 10mins/frequency 30,  
206 centrifuged at 10,000x for one minute. The supernatant was placed into a new tube,  
207 and 25µl proteinase K was added and incubated in a water bath at 56°C for 30mins.  
208 Samples were centrifuged at 8000g for three mins. The clear supernatant was put  
209 into a new tube, and 300µl absolute ethanol was added and shaken briefly, then the  
210 tube was centrifuged to remove the drops from inside of the lid. The solution was put  
211 in a QIAGEN mini-column and centrifuged (8000g/3mins). 750µl AW1 solution was  
212 added into the column and centrifuged (8000g/3mins). The lid of the column was

213 closed and was put in a new collection tube and centrifuged (15000g/1min). The  
214 column was placed in a new 1.5ml tube, and 70µl AE buffer was added inside the  
215 column and centrifuged (8000g/3mins). Samples were stored at -20°C.

216

### 217 **PCR using panfungal primers and *M. mycetomatis* species-specific primers**

218 The isolated genomic DNA was amplified using PCR with panfungal primers ITS5  
219 (5'- GGAAGTAAAAGTCGTAACAAGG -3') and ITS4 (5'-  
220 TCCTCCGCTTATTGATATGC -3') as described previously [23]. In the case of  
221 positive PCR with ITS4 and ITS5, *M. mycetomatis* species-specific primer was used  
222 26.1A(AATGAGTTGGGCTTTAACGG); 28.3A (TCCCGGTAGTG TAGTGTCCT).  
223 Reaction volumes of 20 µl contained 1 µl of genomic DNA, 1.25 U of AmpliTaq gold,  
224 2 µl of 10× PCR buffer, 2 µl of 25 mM MgCl<sub>2</sub>, 2 µl of 2.5 mM deoxynucleoside  
225 triphosphate, and 1 µl of each 10 µM concentrated primers. The PCR products were  
226 amplified in an ICycler thermocycler (Aeris) set up with a first cycle of denaturation  
227 for 5 min at 95°C, followed by 40 cycles of denaturation at 94°C for 30 s, annealing  
228 at 56°C for 30 s, and elongation at 72°C for 30 s, with a final extension step of 10  
229 min at 72°C. PCR products were visualised on 1% agarose gel after ethidium  
230 bromide staining.

231

### 232 **Statistical analysis**

233 The data were managed by the Statistical Package for Social Sciences (SPSS)  
234 program (version 16). Descriptive statistics tests to measure the mean, percentages

235 and ranges were used to analyse the obtained data on entomological surveillance  
236 and KAP study.

237

## 238 **Results**

### 239 **Indoor resting and outdoor arthropod vectors**

240 In this study, three groups of medically important arthropod vectors; mosquitoes,  
241 sandflies and ticks were collected from indoors and outdoors. For mosquitoes, forty-  
242 three indoor-resting mosquitoes of the *Anopheles*(*An.*) and *Culex*(*Cx.*) genera were  
243 collected and that included *Anopheles gambiae* complex (81.4%) and *Culex* species  
244 (18.6%). One hundred nineteen sandflies were collected; 73.1% belonged to  
245 *Sergentomyia* (*S.*) genus while 26.9% belonged to *Phlebotomus* (*P.*) genus. It was  
246 noticeable that cockroaches, houseflies and crickets were found in high densities  
247 indoors (Range of 15-30, 6-15 and 17-28 respectively). Other common non-  
248 arthropod vectors commonly found indoors included ants, silverfish and beetles.

249

250 Ticks were found in animal shelters present inside houses with very high levels of  
251 infestation and density; 100% infestation rate and densities that often range between  
252 hundreds and thousands in cows, sheep and goats. It is observed that unclean  
253 animal shelters, availability of animal dung, high density and diversity of animals  
254 accompanied with no veterinary services provided suitable environment for ticks.  
255 The contact level between humans, animals and ticks is considerably high inside  
256 animal shelters in comparison to grazing areas which led to a shift in the normal life

257 cycle of ticks as breeding can take place inside animal shelters within the houses  
258 rather than at outdoor grazing areas.

259 Also, domestic animals (especially goats and sheep) were frequently found inside  
260 rooms and as villagers allow them to enter rooms during the hot hours in the middle  
261 of the day as the inside rooms provide a place with more suitable temperature. Also  
262 the same scenario happens during rainy season to protect their animals from rains.

263

264 One hundred forty-five ticks were randomly collected from animals (mainly goats and  
265 cows) found in animal shelters. The tick samples belonged to three genera and four  
266 species, and the later included *Hyalomma (H.) anatolicum* (11.03%), *Hyalomma (H.)*  
267 *rufipes* (0.67%), *Rhipicephalus (R.) evertsi* (73.1%) and *Amblyoma (A.) lepidium*  
268 (15.2%), (Table 1).Also, two nymphs of *Hyalomma* species were found during the  
269 active search underneath fresh cows dung in one of the animal shelters.

270

## 271 **Results of KAP study**

272 A total of 81 individuals (25 males and 56 females) were interviewed. Most of the  
273 males (72%) were farmers, and 89.2% of the females were housewives.26% of  
274 females reported a history of having a mycetoma infection at some stage. Both  
275 males and females had low educational level as 48% of males were illiterate, 24%  
276 had primary school education, 16% completed secondary school and 12% did not go  
277 to school and had some education at Khalwa (traditional place for learning Quran).  
278 For females, 53.5% had primary school education, 28.5% were illiterate, 14.2%  
279 completed secondary school and 3.5% studied at Khalwa. Villagers have a very

280 simple life and main day time activities of the villagers included agricultural practice  
281 (92.5%), collection of firewood (61.7%) and grazing (24.6%). Most of the villagers  
282 (90.1%) reported an increased risk of animal bites during agricultural practices,  
283 71.6% during the collection of firewood and 22.2% during grazing.

284 All villagers reported ticks as outdoor arthropod vectors, and 16% reported ticks as  
285 one of the arthropod species that bite outdoors while 7.3% reported ticks as one  
286 of the nocturnal arthropods. All villagers had very poor knowledge by diseases  
287 transmitted by arthropod vectors (especially ticks) and all of them reported that they  
288 do not use any protection measure to prevent them from arthropod bites (indoors  
289 and outdoors) (Table 2).

290

### 291 ***Madurella mycetomatis* molecular screening**

292 Several arthropods pools were screened for the presence of *M. mycetomatis* DNA  
293 and that included one pool of 31 *Anopheles* females, one pool of eight *Culex*  
294 females and one pool of 28 *Phlebotomus* unfed females. Ticks samples were  
295 divided into pools according to the species and developmental stage. The *R. evertsi*  
296 samples were divided into five pools; one pool of 13 nymphs of larger size, one pool  
297 of 54 nymphs of medium size, one pool of 22 nymphs of small size, one pool of  
298 three adults with eggs and a pool of 14 adults. Other pools consisted of one pool of  
299 22 *A. lepidium* adults, one pool of 16 *H. anatolicum* adults in addition to the one  
300 sample of *H. rufipes* adult.

301 The molecular screening showed that one pool containing *R. evertsi* DNA samples  
302 and one sample of *H. rufipes* DNA gave positive results following PCR amplification

303 of the universal fungal positive primer while *H. rufipes* sample gave positive results  
304 for *M. mycetomatis* using a specific primer (Figs 1,2).

305

## 306 **Discussion**

307 Presently, there are many controversies on the mycetoma causative organisms  
308 route of entry and disease susceptibility and resistance. However, mechanical  
309 implantation into the subcutaneous tissue is a prevalent theory [6]. Also, it is  
310 believed that certain environmental factors such as the poor hygiene, overcrowd  
311 housing, dirt, presence of animals' dung, and others may contribute to this infection  
312 by providing a suitable environment for the causative organisms to survive but that is  
313 not clear yet [15]. Such poor environmental conditions also are suitable milieu for  
314 arthropod vectors to flourish. Considering all these, the current study was conducted  
315 to study the role of the common disease-transmitting arthropod vectors on  
316 mycetoma transmission in an endemic village at Sennar State, Sudan. The study  
317 reports, for the first time, the detection of *Madurella mycetomatis* DNA in ticks, and  
318 that may indicate their possible role in the transmission of mycetoma disease.

319 From the data obtained in this study, we can extrapolate a possible association  
320 between the ticks and mycetoma causative organisms' transmission. Ticks are  
321 known as the most important vectors of many diseases affecting livestock and  
322 companion animals [21]. In addition, ticks are the second only to mosquitoes as  
323 vectors of human infectious diseases worldwide as they are known disease vectors  
324 for various diseases of protozoal, rickettsial, spirochetes, viral, fungal and bacterial  
325 origin and most of these diseases are of zoonotic origin. Since 1982, eight newly

326 recognised tick-borne rickettsial; three species of ehrlichiae and three pathogenic  
327 species of the *B. burgdorferi* complex were reported to cause human diseases [22].  
328 In Sudan, ticks and tick-borne diseases are wide spreading and cause substantial  
329 economic losses and constitute significant obstacles to the development of animal  
330 wealth. They are commonly causing important diseases such as tropical theileriosis,  
331 cowdriosis, babesiosis, anaplasmosis and avian spirochaetosis [23]. In Western  
332 Sudan, ticks are incriminated for the transmission of Crimean-Congo hemorrhagic  
333 fever in humans [24]. Tick species reported in this study were in agreement with the  
334 reported tick species in Sennar state, that are capable of producing animal diseases,  
335 specifically *Hyalomma anatolicum* species [25, 26]. Despite the economic and health  
336 importance of ticks it is believed that the reported knowledge on ticks and tick-borne  
337 diseases is still fragmentary and far from complete [23].  
338 The present study showed high infestation of ticks accompanied with high densities  
339 inside animal shelters the studied village. In the ticks' normal life cycle the drop off of  
340 the engorged females, oviposition and infestation happens outdoors (in grazing  
341 areas). However, in the studied village, high infestation rates and densities of ticks  
342 were due to unclean animal shelters, availability of animal dung, presence of high  
343 density and diversity of animals in addition to the high human contact level between  
344 animals and ticks points to a shift from the normal life cycle which completes indoors  
345 (in animal shelters) rather than in outdoors. Human contact level with ticks is higher  
346 in inside animal shelters in comparison to outdoor grazing areas.

347

348 The KAP study showed that villagers recognized ticks more than other indoor and  
349 outdoor arthropod. Also, men are in close and regular contact with immature stages  
350 of ticks during daytime indoor and outdoor activities, mainly during grazing and  
351 agricultural activities. Furthermore, women had high contact with ticks during the  
352 indoor activities in the animal shelters such as the milk milking process. In addition,  
353 both sexes also get exposed to ticks during the collection of wood and plants for fire  
354 and feeding animals from grazing areas. Moreover, villagers allow their animals to  
355 spend the daytime inside their rooms, especially during the hot dry season and the  
356 rainy seasons to protect them from the heat and rain. The KAP study showed that  
357 all villagers do not use any protection measure against arthropod bites, which points  
358 to the high exposure level to arthropod bites. We can postulate that villagers due to  
359 high direct contact with the ticks and the poor personal hygiene might get bitten  
360 more frequently by ticks, and the true percentage might exceed the percentage  
361 reported on this study. The reason is that ixodid ticks bites usually are usually  
362 painless and the immature ticks are often not detected in the human body due to  
363 their small size and hence the history of the local bite may not have recognised [22].  
364 Moreover, got bitten by ticks is considered a social stigma therefore, probably some  
365 villagers are reluctant to report such event.

366 In the tropics, people often develop reactions to arthropods bites, and bacterial skin  
367 infections (pyodermias) usually follow such bites, stings and the mechanical trauma  
368 [27]. The type of reaction depends on the insect species, the age group and the  
369 human host reaction. The latter depends on the degree of previous exposure to the  
370 same or a related species of arthropod [28,29].



371 Ticks usually attach to human skin through their oral devices leading to diverse initial  
372 cutaneous manifestations, which can be classified into primary and secondary  
373 lesions. The primary one is caused by the attachment the tick to the host skin  
374 leading to severe skin inflammatory reaction due to the saliva anticoagulant  
375 substances and due to the penetration and permanence of the ticks' mouthparts.  
376 The secondary lesions are due to the infections caused by rickettsia, bacteria,  
377 protozoa and fungi inoculated by the ticks [30]. From all these facts, we can then  
378 extrapolate that ticks mechanically can transmit mycetoma causative organism  
379 specifically under poor hygiene.

380 The life span of Ixodidae ticks ranges from several months to three years and they  
381 are less resistant to starvation and desiccation. Each ticks' stages feed slowly by  
382 firmly attached to the host [22]. This indicates the ticks' likelihood in diseases  
383 transmission, especially zoonotic diseases. Several studies showed that ticks prefer  
384 to bite lower extremities [22] and it is well known that the foot and hand are the most  
385 frequently affected sites (82%) in mycetoma affecting Sudanese patients [31] and  
386 that may support the ticks' transmission postulation.

387  
388 In Sudan, *M. mycetomatis* was isolated from soil and thorns samples and there is a  
389 possibility of a mycetoma-*Acacia* association [15, 32]. There is now evidence, from  
390 phylogenetic studies, that *Madurella* species are nested within the *Chaetomiaceae*,  
391 a family of fungi that mainly inhabit animal dung, enriched soil, and indoor  
392 environments [33]. In this study reported the collection of immature stages of ticks  
393 from underneath fresh cows dung inside animal shelters. This point to the possible

394 association of ticks with the causative agents of mycetoma present on the soil and/or  
395 animal dung. The high contact level between animals, humans and ticks in animal  
396 shelters and the fact that ticks is frequently bite humans points to the possibility of  
397 incrimination of ticks on transmission of mycetoma disease.

398 The role of mosquitoes and sandflies on the transmission of mycetoma disease  
399 needs further investigations. The life cycle of immature mosquitoes is much  
400 associated with water. *Anopheles arabiensis*, a member of the *An. gambiae* complex  
401 is the main falciparum malaria vector in the eastern locality of Sennar State, and  
402 there is a marked seasonality on the transmission of malaria disease in this area  
403 [34-36]. However, in mycetoma, there is no clear seasonal variation, and hence, it is  
404 unlikely that these mosquitoes to have a role in the disease transmission.

405  
406 Sandflies are the main vectors of visceral and cutaneous Leishmaniasis (CL) which  
407 are endemic in the studied area in eastern Sennar. In this area, visceral  
408 leishmaniasis is caused by *Leishmania donovani* and transmitted by *P. orientalis*  
409 while cutaneous leishmaniasis is caused by *Leishmania major* parasites and  
410 transmitted by *P. papatasi* sandflies [37, 38]. Transmission of leishmaniasis occurs  
411 most frequently outdoors with reports documenting indoor transmission [39-40]. The  
412 life cycle of sandflies is unknown until now. However, many reports showed that  
413 cracked cotton soil found in the study area could play a role as a resting or breeding  
414 places of adults vectors. Dogs, canines and the Egyptian mongoose, are possible  
415 reservoir host of visceral leishmaniasis in eastern Sudan [41]. However, the

416 seasonality of leishmaniasis may not support the role of the sandflies in transmitting  
417 mycetoma.

418

419 In conclusion, an association between the animals' dungs, ticks and mycetoma  
420 transmission can be suggested from this study. However, the role is unclear, but it  
421 can be postulated that tick bites cause minor injuries that may facilitate the  
422 inoculation of the mycetoma organisms into the subcutaneous tissue. However, this  
423 needs further studies. Furthermore, the role of the domestic animals as a possible  
424 mycetoma causative agents host reservoir and transmission needs meticulous  
425 investigation.

426

#### 427 **Acknowledgements**

428 The efforts of the Sennar State Ministry of Health staff in facilitating the study  
429 conduction were massive and enormous. Prof. Yassir Osman, Professor of  
430 Parasitology, Veterinary Research Center, Soba, Sudan, had kindly assisted in the  
431 ticks' identification.

432

#### 433 **Ethics Statement**

434 The Mycetoma Research Centre, IRB approved the study.

435

#### 436 **References**

437

- 438 1. Ahmed AO, van Leeuwen W, Fahal A, van de Sande WWJ, Verbrugh H, et al.  
439 Mycetoma caused by *Madurella mycetomatis*: a neglected infectious burden.  
440 Lancet Infect. Dis.2004; 4: 566–574.

441

442 2. Ahmed AE, Van de Sande WWJ, Fahal AH. Mycetoma laboratory diagnosis:  
443 Review article. PLoS Negl. Trop. Dis. 2017; 11(8): e0005638.

444

445 3. Van de Sande WWJ. Global burden of human mycetoma: a systematic review  
446 and meta-analysis. PLoS Negl. Trop. Dis. 2013; 7: e2550.

447

448 4. Fahal AH. Mycetoma: A global medical and socio-economic dilemma. PLoS  
449 Negl Trop Dis. 2017; 11(4): e0005509.

450

451 5. Zijlstra EE, van de Sande WW, Fahal AH. Mycetoma: A Long Journey from  
452 Neglect. PLoS Negl. Trop. Dis. 2016; 10(1): e0004244.

453

454 6. Van de Sande W, Mahgoub ES, Fahal AH, Goodfellow M, Welsh O, et al. The  
455 Mycetoma Knowledge Gap: Identification of Research Priorities. PLoS Negl.  
456 Trop. Dis. 2014;8(3): e2667.

457

458 7. Fahal AH. Mycetoma: a thorn in the flesh. Trans. R. Soc. Trop. Med. Hyg.  
459 2004; 98(1):3-11.

460

461 8. Ajello L, Zeidberg LD. Isolation of *Histoplasma capsulatum* and *Allescheria*  
462 *boydii* from soil. Science 1951; 113: 662-663.

463

464 9. Ajello L. The isolation of *Allescheria boydii* shear, an etiologic agent of  
465 mycetomas, from soil. Am. J. Trop. Med. Hyg. 1952; 1: 227–238. 32.

466

467 10. Gonzalez-Ochoa A, Sandoval MA. Isolation of *Nocardia brasiliensis* and  
468 20steroids from soils. Rev Inst Salubr Enferm Trop. 1960; 20: 147–151.

469

470 11. Sotgiu G, Mazzoni A, Mantovani A, Ajello L, Palmer J. Survey of soils for  
471 human pathogenic fungi from the Emilia-Romagna region of Italy. II. Isolation

- 472           of *Allescheria boydii*, *Cryptococcus neoformans* and *Histoplasma capsulatum*.  
473           Am J Epidemiol. 1966; 83: 329–337.  
474
- 475       12. Segretain G, Mariat F. Research on the presence of agents of mycetoma in  
476           the soil and thorny plants of Senegal and Mauritania. Bull. Soc. Pathol. Exot  
477           Filiales 1968; 61: 194–202.  
478
- 479       13. Orchard VA, Goodfellow M. Numerical classification of some named strains of  
480           *Nocardia 21steroids* and related isolates from soil. J Gen Microbiol. 1980;  
481           118: 295–312.  
482
- 483       14. Parthasarathi K, Ranganathan LS, Anandi V, Zeyer J. Diversity of microflora  
484           in the gut and casts of tropical composting earthworms reared on different  
485           substrates. J. Environ. Biol. 2007; 28: 87–97.  
486
- 487       15. Ahmed A, Adelman D, Fahal A, Verbrugh H, van Belkum A, de Hoog S.  
488           Environmental occurrence of *Madurella mycetomatis*, the major agent of  
489           human eumycetoma in Sudan. J. Clin Microbiol. 2002; 40(3):1031-6.  
490
- 491       16. WHO. Standard Procedure for the Surveillance of Disease Vector Based on  
492           the Context of Integrated Vector Management. 2008  
493
- 494       17. Edwards W. Mosquitoes of the Ethiopian Region. III. Culicinae adults and  
495           pupae. London, British Museum (Natural History). 1941; 499 pp.  
496
- 497       18. Gillies T, De. Meillon B. The *Anopheles* of Africa south of the Sahara. South  
498           Africa. Insect Medical Research, Johannesburg. 1968; 343 pp.  
499
- 500       19. Quate LW. *Phlebotomus* sandflies of the Paloich area in the Sudan (Diptera:  
501           Psychodidae). J. Med. Ent. 1964; 1(3):213-268.  
502

- 503 20. Hoogstraal H. African Ixodidae Ticks of the Sudan. Vol I (with special  
504 reference to Equatoria Province and with preliminary reviews of the genera  
505 Boophilus, Margaropus and Hyalomma). Available at  
506 <http://www.cabdirect.org/cabdirect/abstract/19572901469>.  
507
- 508 21. Jongejan F, Ulenberg G. The global importance of ticks. Parasitology. 2004;  
509 129, S3-S14.  
510
- 511 22. Parola P, Raoult D. Ticks and tick-borne bacterial diseases in human: an  
512 emerging infectious threat. Clin. Infect. Dis. 2001; 32:897-928.  
513
- 514 23. El Hussein AR, Majid AM, Shawgi MH. Present status of tick-borne diseases  
515 in Sudan. Arch Inst Pasteur Tunis. 2004; 81(1-4):31-34.  
516
- 517 24. Ibrahim AM, Adam IA, Osman BT, Aradaib IE. Epidemiological survey of  
518 Crimean Congo hemorrhagic fever virus in cattle in East Darfur State, Sudan.  
519 Ticks Tick-BorneDis. 2015;6(4):439-44.  
520
- 521 25. Mohammed MS, Hassan SM. Distribution and population dynamics of ticks  
522 (Acari: Ixodidae) infesting sheep in Sennar State, Sudan. Onderstepoort J.  
523 Vet Res. 2007;74(4):301-6.  
524
- 525 26. Salih DA, Sharieff OE, Lazarus AG, Hassan SM, El Hussein AM. Natural  
526 infection rates and transmission of *Theileria annulata* by *Hyalomma*  
527 *anatolicum anatolicum* ticks in the Sudan. Onderstepoort J. Vet Res. 2005;  
528 72(4):303-7.  
529
- 530 27. Hengge UR. Arthropod bite reactions and pyodermias. Hautarzt. 2008;  
531 59(8):633-41.  
532

- 533 28. Hernandez RG, Cohen BA. Insect bite-induced hypersensitivity and the  
534 SCRATCH principles: a new approach to papular urticaria. *Pediatrics*. 2006;  
535 118:189-196.
- 536  
537 29. Raza N, Lodhi MS, Ahmed S. Clinical study of papular urticaria. *J. Coll*  
538 *Physicians. Surg Pak*. 2008; 18: 147-150.
- 539  
540 30. Haddad V Jr, Haddad MR, Santos M, Cardoso JLC. Skin manifestations of  
541 tick bites in humans. *An. Bras Dermatol*. 2018; 93(2):251-255.
- 542  
543 31. Lynch JB. Mycetoma in the Sudan. *Ann. R. Coll. Surg. Engl*. 1964; 35: 319–  
544 340.
- 545  
546 32. Samy AM, van de Sande WW, Fahal AH, Peterson AT. Mapping the Potential  
547 Risk of Mycetoma Infection In Sudan and South Sudan Using Ecological  
548 Niche Modeling. *PLoS Negl. Trop. Dis*. 2014 8(10): e3250.
- 549  
550 33. De Hoog GS, Abdalla Ahmed S, Najafzadeh MJ, Sutton DA, Saradeghi  
551 Keisari M, et al. Phylogenetic findings suggest possible new habitat and  
552 routes of infection of human eumycetoma. *PLoS Negl. Trop. Dis*. 2013;7:  
553 e2229.
- 554  
555 34. Babiker HA, Abdel-Muhsin AA, Hamad A, Mackinnon MJ, Hill WG, Walliker D.  
556 Population dynamics of *Plasmodium falciparum* in an unstable malaria area of  
557 eastern Sudan. *Parasitology* 2000;120 (Pt 2):105-11.
- 558  
559 35. Hamad AA, Nugud Ael H, Arnot DE, Giha HA, Abdel-Muhsin AM, et al.  
560 seasonality of malaria transmission in two rural sites in eastern Sudan. *Acta*  
561 *Trop*. 2002 ;83(1):71-82.
- 562  
563 36. Petrarca V, Nugud AD, Ahmed MA, Haridi AM, Di Deco MA, et al.  
564 Cytogenetics of the *Anopheles gambiae* complex in Sudan, with special

- 565 reference to *An. arabiensis*: relationships with East and West African  
566 populations. *Med. Vet. Entomol.* 2000;14(2):149-64.
- 567
- 568 37. Zijlstra EE, el-Hassan AM. Leishmaniasis in Sudan. *Visceral leishmaniasis*. T.  
569 Roy. Soc. Trop. Med. H. 2001;95 Suppl 1:S27-58.
- 570
- 571 38. Hassan MM, Elamin EM, Mukhtar MM. Isolation and identification of  
572 *Leishmania donovani* from *Phlebotomus orientalis*, in an area of eastern  
573 Sudan with endemic visceral leishmaniasis. *Acta Trop.* 2008;102(6):553-5.
- 574
- 575 39. Hassan MM, Elraba'a FM, Ward RD, Maingon RD, Elnaiem DA. Detection of  
576 high rates of in-village transmission of *Leishmania donovani* in eastern  
577 Sudan. *Acta Trop.* 2004;92(1):77-82
- 578
- 579 40. Elnaiem DE, Osman OF. Evidence for active transmission of visceral  
580 leishmaniasis within a village in eastern Sudan. *Acta Trop.* 1998;  
581 30;71(3):305-9.
- 582
- 583 41. Elnaiem DA, Hassan MM, Maingon R, Nureldin GH, Mekawi AM, Miles M,  
584 Ward RD. The Egyptian mongoose, *Herpestes ichneumon*, is a possible  
585 reservoir host of visceral leishmaniasis in eastern Sudan. *Parasitology*  
586 2001;122(5):531-6.
- 587



588 Table 1: Indoor and outdoor arthropods collected during the cold dry season from  
 589 the studied village.  
 590  
 591

| Arthropod Vectors | Indoor diurnal                |                     |            |          | Outdoor nocturnal |              | Direct pickup from animals |
|-------------------|-------------------------------|---------------------|------------|----------|-------------------|--------------|----------------------------|
|                   | Knockdown Total No (%)        |                     |            |          | Light trap        | Sticky paper |                            |
|                   | Species                       | Abdominal condition |            |          | Total No. (%)     |              |                            |
|                   | Unfed                         | blood-fed           | males      |          |                   |              |                            |
| Mosquitoes        | <i>Anopheles gambiae s.l.</i> | 24(69%)             | 7 (20%)    | 4(11%)   | 9(69.2%)          | 0(0.0%)      | 0(0.0%)                    |
|                   | <i>Culex</i> species          | 6 (75%)             | 2 (25%)    | 0(0.0%)  | 4(30.8)           | 0(0.0%)      | 0(0.0%)                    |
| Sandflies         | <i>Phlebotomus</i> species    | 16(50%)             | 12(37.5%)  | 4(12.5%) | 20(20%)           | 19(25%)      | 0(0.0%)                    |
|                   | <i>Sergentomias</i> species   | 64(74%)             | 22 (25%)   | 1 (1%)   | 80(80%)           | 57(75%)      | 0(0.0%)                    |
| Ticks             | <i>Hyalomma anatolicum</i>    | 0 (0.0%)            | 16(11.0%)  | *        | 0(0.0%)           | 0(0.0%)      | 16 (11.0%)                 |
|                   | <i>Hyalomma rufipes</i>       | 0(0.0%)             | 1 (0.7%)   | *        | 0(0.0%)           | 0(0.0%)      | 1(0.7%)                    |
|                   | <i>Rhipicephalus evertsi</i>  | 0(0.0%)             | 106(73.1%) | *        | 0(0.0%)           | 0(0.0%)      | 106(73.1%)                 |
|                   | <i>Amblyoma lepidium</i>      | 0(0.0%)             | 22(15.2%)  | *        | 0(0.0%)           | 0(0.0%)      | 22 (15.2%)                 |

\*sex was not determined

592  
 593

594 Table 2: Results of the Knowledge, attitude and practice of the studied population  
 595 toward local arthropod species in the studied village  
 596

| <b>Knowledge</b>                          |          |                                                  |          |
|-------------------------------------------|----------|--------------------------------------------------|----------|
| <b>Day time indoor arthropods</b>         | <b>%</b> | <b>Day time indoor arthropods that bite</b>      | <b>%</b> |
| Ants                                      | 88.8     | Mosquitoes                                       | 62.9     |
| Spiders                                   | 50.6     | Ants                                             | 70.3     |
| Crickets                                  | 19.7     | Sandflies                                        | 17.2     |
| Cockroaches                               | 38.2     |                                                  |          |
| Flies                                     | 16.0     |                                                  |          |
| Mosquitoes                                | 07.4     |                                                  |          |
| Fleas                                     | 04.9     |                                                  |          |
|                                           |          |                                                  |          |
| <b>Day time outdoor arthropods</b>        | <b>%</b> | <b>Daytime outdoor arthropods that bite</b>      | <b>%</b> |
| Ticks                                     | 100      | Ants                                             | 100      |
| Flies                                     | 44.4     | Mosquitoes                                       | 72.8     |
| Ants                                      | 100      | Ticks                                            | 16       |
| Cockroaches                               | 20.9     | Fleas                                            | 44.4     |
| Crickets                                  | 08.6     |                                                  |          |
| Fleas                                     | 44.4     |                                                  |          |
| Sandflies                                 | 08.6     |                                                  |          |
|                                           |          |                                                  |          |
| <b>Indoor nocturnal arthropods</b>        | <b>%</b> | <b>Indoor nocturnal arthropods that bite</b>     | <b>%</b> |
| Mosquitoes                                | 100      | Mosquitoes                                       | 90.1     |
| Crickets                                  | 100      | Ant                                              | 30.8     |
|                                           |          | Sandflies                                        | 03.7     |
|                                           |          |                                                  |          |
| <b>Outdoor nocturnal arthropods</b>       | <b>%</b> | <b>Outdoor nocturnal arthropods that bite</b>    | <b>%</b> |
| Mosquitoes                                | 91.3     | Mosquitoes                                       | 100      |
| Crickets                                  | 46.9     | Ants                                             | 100      |
| Ticks                                     | 07.3     |                                                  |          |
| Cockroaches                               | 06.1     |                                                  |          |
|                                           |          |                                                  |          |
| <b>When do arthropods appear</b>          | <b>%</b> | <b>Diseases transmitted by arthropod vectors</b> | <b>%</b> |
| Autumn                                    | 76.5     | Malaria                                          | 13.0     |
| During the year and increase in autumn    | 23.4     | Leishmania                                       | 02.0     |
|                                           |          | Other diseases                                   | 0.00     |
|                                           |          |                                                  |          |
| <b>Human Disease transmitted by ticks</b> |          |                                                  |          |

|                                               |      |                                                   |      |
|-----------------------------------------------|------|---------------------------------------------------|------|
| No                                            | 100  |                                                   |      |
| yes                                           | 0.00 |                                                   |      |
| <b>Attitude and Practice</b>                  |      |                                                   |      |
| <b>Day time activities</b>                    | %    | <b>Nighttime activities</b>                       | %    |
| Agriculture                                   | 92.5 | social activities                                 | 92.5 |
| Collection of firewood                        | 61.7 | Watch TV                                          | 06.1 |
| Grazing                                       | 24.6 | Studying                                          | 01.2 |
| Go to school                                  | 06.1 |                                                   |      |
|                                               |      |                                                   |      |
| <b>Habits associated with arthropod bites</b> | %    | <b>Protection measure against arthropod bites</b> | %    |
| Agricultural practices                        | 90.1 | No                                                | 100  |
| Collection of firewood                        | 71.6 | Yes                                               | 00.0 |
| Grazing                                       | 22.2 |                                                   |      |
|                                               |      |                                                   |      |

597 .

598

599

600

601  
602  
603  
604  
605  
606  
607  
608  
609  
610  
611  
612  
613  
614  
615  
616  
617  
618  
619  
620  
621  
622  
623  
624

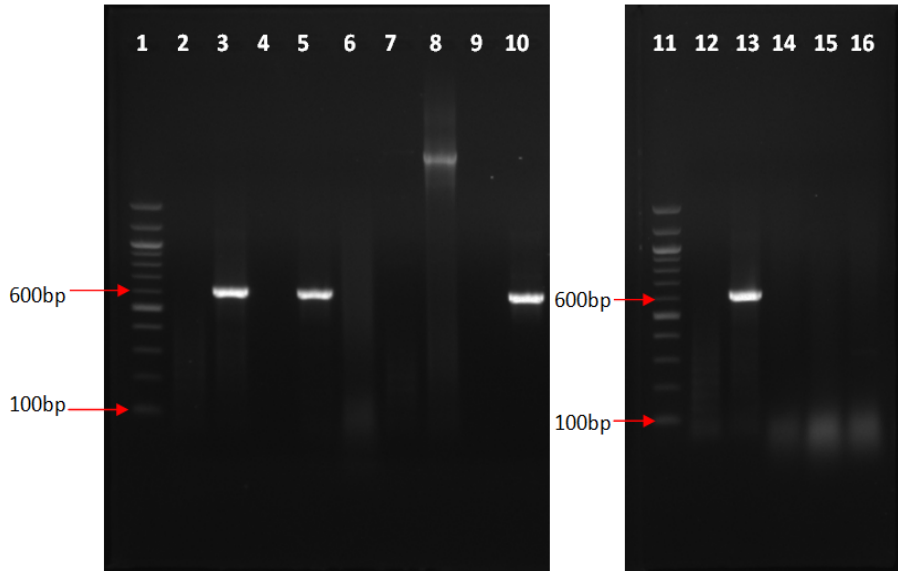

Fig. 1: 1% agarose gel visualising PCR products for the amplification of DNA pools using universal fungus primer.

Lanes 1, 11: DNA ladder, lane 2: -ve control, Lane 3: +ve control, Lane 4: pool of *R. evertsi*, lane 5 = pool of *Rhipicephalus evertsi*, Lane 6: pool of *Amblyoma lepidium*, Lane 7: pool of *Rhipicephalusevertsi*, Lane 8: pool of *Hyalomma anatolicum*, Lane 9: pool of *Rhipicephalusevertsi*, Lane 10: *Hyalomma rufipes* sample, Lane 12: -ve control, Lane 13: +ve control, Lane 14: pool of *Phlebotomus* sand flies, Lane 15: pool of *Culex mosquitoes*, Lane 16: pool of *An. gambiae* complex.

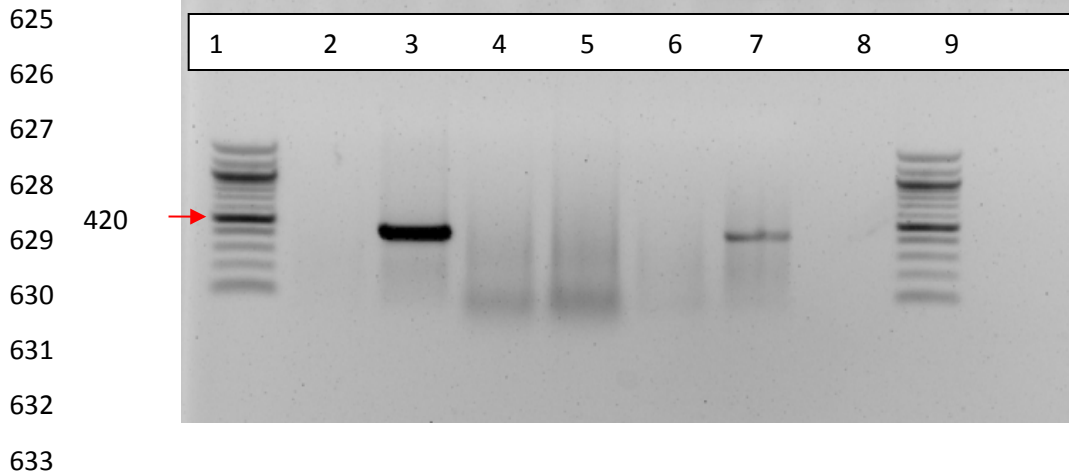

634 Fig.2: 1% agarose gel visualising PCR products for the amplification of *M.*  
635 *mycetomatis* using specific primers.

636 Lanes 1,9: 100 bp DNA Ladder, Lane 2: MM negative control, Lane 3: MM positive  
637 control, Lane 4: pool of *Rhipicephalus evertsi*, Lane 5: pool of *Hyalomma*  
638 *anatolicum*, lane 6: pool of *Amblyoma lepidium*, Lane 7: *Hyalomma rufipes* sample,  
639 Lane 8: pool of *Rhipicephalus evertsi*

640
